# Supplementary material for: Metabolomics and Microbiomes as Potential Tools to Evaluate the Effects of the Mediterranean Diet
Source: Nutrients. 2019 Jan 21;11(1):207. doi: 10.3390/nu11010207 (PMC6356665; doi:10.3390/nu11010207)
Supplement: Supplementary file 1 [file nutrients-11-00207-s001.pdf]

**Table S1.** Main findings and evidence from metabolites associated with food (higher levels of metabolites are associated with higher levels of food item consumption/dietary pattern adherence unless otherwise specified).

| Metabolite                    | Food Item/Dietary Pattern                                                                                                                                                                                                                                                                                                                                |
|-------------------------------|----------------------------------------------------------------------------------------------------------------------------------------------------------------------------------------------------------------------------------------------------------------------------------------------------------------------------------------------------------|
| TMAO                          | Meat products [1]; omnivorous diet [2]; seafood [3]; Nordic diet [3]; low glycemic load diet [4]; low dairy intake [5]; a pattern that is high in meat, refined bread, and butter and low in vegetables, whole-meal bread, and fruits (cluster 3) [6]; low-fat diet [7,8]; and a diet that is most concordant with the WHO healthy eating guidelines [9] |
| Dimethylamine                 | Omnivorous diet [2]; a diet that is most concordant with the WHO healthy eating guidelines [9]                                                                                                                                                                                                                                                           |
| 2,6-dihydroxybenzoic acid     | High-fiber diet [10]                                                                                                                                                                                                                                                                                                                                     |
| 2-aminophenol sulfate         | High-fiber diet [10]                                                                                                                                                                                                                                                                                                                                     |
| Hippuric acid                 | Dietary fiber intake [11]; tea consumption [3,12,13]; phytochemical diet [14]; Nordic diet [3]; a diet high in whole grains, fatty fish, and blueberries [15]; whole grain [15]                                                                                                                                                                          |
| Hippurate                     | Low dairy consumption [5]; low-fat diet [8]; a diet that is most concordant with the WHO healthy eating guidelines [9]; low glycemic index diet [7]; a healthy cluster: higher intakes of breakfast cereals, low fat and skimmed milks, potatoes, fruit, fish, and fish dishes [16].                                                                     |
| Kynurenate                    | Low glycemic load diet [4]                                                                                                                                                                                                                                                                                                                               |
| Valine                        | Protein intake [17]; high in potatoes, dairy products, and cornflakes intake dietary pattern [18]; fish eaters [19]; vegetarians [19]; Mediterranean diet [8].                                                                                                                                                                                           |
| Phenylalanine                 | Protein intake [17]; high-fat meal with whey protein isolate [20]; coffee consumption negatively associated with phenylalanine in men [21]; Western dietary pattern [22]; omnivorous diet [2];                                                                                                                                                           |
| Tyrosine                      | Protein intake [17]; fish eaters [19]; vegetarians [19]                                                                                                                                                                                                                                                                                                  |
| Glutamine                     | Inversely associated with protein intake [17]                                                                                                                                                                                                                                                                                                            |
| Tryptophan                    | High-fat meal with whey protein isolate [20]; fish eaters [19]; vegetarians [19]; a healthy cluster: higher intakes of breakfast cereals, low fat and skimmed milks, potatoes, fruit, fish, and fish dishes [16].                                                                                                                                        |
| Kynurenine                    | High-fat meal with whey protein isolate [20]                                                                                                                                                                                                                                                                                                             |
| Theobromine metabolites       | Cocoa consumption [23]                                                                                                                                                                                                                                                                                                                                   |
| Polyphenol metabolites        | Cocoa consumption [23]; consumption of poly-phenol rich foods (coffee, tea, red wine, citrus fruit, apples, pears, and chocolate) [24]                                                                                                                                                                                                                   |
| Tartrate                      | Wine polyphenol consumption [25]                                                                                                                                                                                                                                                                                                                         |
| Hydroxyphenylvaleric          | Flavan-3-ols from almond skin [26]                                                                                                                                                                                                                                                                                                                       |
| Hydroxyphenylpropionic        | Flavan-3-ols from almond skin [26]                                                                                                                                                                                                                                                                                                                       |
| Hydroxyphenylacetic acids     | Flavan-3-ols from almond skin [26]                                                                                                                                                                                                                                                                                                                       |
| Betonicine                    | High polyphenol orange juice [27]                                                                                                                                                                                                                                                                                                                        |
| Stachydrine                   | High polyphenol orange juice [27]                                                                                                                                                                                                                                                                                                                        |
| Methyl glucopyranoside        | High polyphenol orange juice [27]                                                                                                                                                                                                                                                                                                                        |
| Dihydroferulic acid           | High polyphenol orange juice [27]                                                                                                                                                                                                                                                                                                                        |
| Galactonate                   | High polyphenol orange juice [27]                                                                                                                                                                                                                                                                                                                        |
| Proline                       | Citrus intake [28,29], Mediterranean diet [8].                                                                                                                                                                                                                                                                                                           |
| Betaine                       | Citrus intake [20,29]; a healthy cluster: higher intakes of breakfast cereals, low fat and skimmed milks, potatoes, fruit, fish, and fish dishes [16]                                                                                                                                                                                                    |
| S-methyl-L-cysteine sulfoxide | Cruciferous vegetables intake [30]                                                                                                                                                                                                                                                                                                                       |

|                                                  |                                                                                                                                                                                                                                                                                                                                                              |
|--------------------------------------------------|--------------------------------------------------------------------------------------------------------------------------------------------------------------------------------------------------------------------------------------------------------------------------------------------------------------------------------------------------------------|
| Creatine                                         | High-lycopene tomato sauce [31]; Mediterranean diet [8]; a diet that is least concordant with the WHO healthy eating guideline and has high intake of red meat [9]                                                                                                                                                                                           |
| Creatinine                                       | High-lycopene tomato sauce [31]; high dairy consumption [5], Mediterranean diet [8]; an unhealthy cluster: higher intakes of chips/processed potatoes, meat products, savory snacks, and high-energy beverages [7]                                                                                                                                           |
| Leucine                                          | High-lycopene tomato sauce [31]; refined wheat bread [32]; Western dietary pattern [22]; high potatoes, dairy products, and cornflakes intake dietary pattern [18]; fish eaters [19]; vegetarians [19]; Mediterranean diet [8].                                                                                                                              |
| Choline                                          | High-lycopene tomato sauce [31]                                                                                                                                                                                                                                                                                                                              |
| Methionine                                       | High-lycopene tomato sauce [31]; high potatoes, dairy products, and cornflakes intake dietary pattern [18]; fish eaters [19]; vegetarians [19]                                                                                                                                                                                                               |
| Acetate                                          | High-lycopene tomato sauce [31]                                                                                                                                                                                                                                                                                                                              |
| Ascorbic acid                                    | Normal-lycopene content tomato sauce [31]                                                                                                                                                                                                                                                                                                                    |
| Lactate                                          | Normal-lycopene content tomato sauce [31]                                                                                                                                                                                                                                                                                                                    |
| Pyruvate                                         | Normal-lycopene content tomato sauce [31]                                                                                                                                                                                                                                                                                                                    |
| Isoleucine                                       | Normal-lycopene content tomato sauce [31]; refined wheat bread [32]; high potatoes, dairy products, and cornflakes intake dietary pattern [18]; Mediterranean diet [8].                                                                                                                                                                                      |
| Alanine                                          | Normal-lycopene content tomato sauce [31]; low-fat diet [7]                                                                                                                                                                                                                                                                                                  |
| Sphingomyelins                                   | Coffee [33]                                                                                                                                                                                                                                                                                                                                                  |
| Acylcarnitines                                   | Coffee (negative association with long- and medium chain acylcarnitines) [33], Western dietary pattern (positive association with short-chain acylcarnitines) [22], high butter intake and low margarine intake dietary pattern [18], hypocaloric diet (acylcarnitine C9) [17], meat intake (C0, C4, C5) [19], prudent pattern (medium- to long- chain) [22] |
| Diacylphosphatidylcholine                        | Coffee consumption (C32:1, negatively association) [21], dietary component: high poultry, fish, rice, vegetables, fruit, chocolate, flaked oat, cheese, milk, curds, and low meat and sausages [34]                                                                                                                                                          |
| Acylalkyl-phosphatidylcholines                   | Coffee consumption (positive associated with C34:3, C40:6, and C42:5 in women) [21], high butter intake and low margarine intake dietary pattern [18], dietary component: high poultry, fish, rice, vegetables, fruit, chocolate, flaked oat, cheese, milk, curds, and low meat and sausages [34]                                                            |
| Phosphatidylcholines                             | High red meat and fish, and low whole-grain bread and tea dietary pattern [18], hypocaloric diet (phosphatidylcholine-dyacyl C38:6) [17], Mediterranean diet (P-18:1, 20:3) [35]                                                                                                                                                                             |
| Methylxanthines                                  | Coffee [36–38]                                                                                                                                                                                                                                                                                                                                               |
| Methylated forms of hydroxycinnamates            | Coffee [36–38]                                                                                                                                                                                                                                                                                                                                               |
| Hydroxytyrosol                                   | Olive oil consumption [39], phenolic content of food [40], alcohol consumption [39]                                                                                                                                                                                                                                                                          |
| 3-(3,5-dihydroxyphenyl)-1-propanoic acid sulfate | Whole-grain rye bread intake [41]                                                                                                                                                                                                                                                                                                                            |
| Enterolactone glucuronide                        | Whole-grain rye bread intake [41]                                                                                                                                                                                                                                                                                                                            |
| Azelaic acid                                     | Whole-grain rye bread intake [41]                                                                                                                                                                                                                                                                                                                            |
| 2-aminophenol sulfate                            | Whole-grain rye bread intake [41]                                                                                                                                                                                                                                                                                                                            |
| Lysophosphatidylcholine                          | Full-fat dairy [42], high butter intake and low margarine intake dietary pattern [18]                                                                                                                                                                                                                                                                        |
| Lyso-platelet activating factor                  | Full-fat dairy [42]                                                                                                                                                                                                                                                                                                                                          |
| Phospholipid fatty acids                         | Full-fat dairy [42]                                                                                                                                                                                                                                                                                                                                          |

|                                     |                                                                                                                                                                                                                                                                                                                                    |
|-------------------------------------|------------------------------------------------------------------------------------------------------------------------------------------------------------------------------------------------------------------------------------------------------------------------------------------------------------------------------------|
| Citrate                             | High dairy consumption [5], lactovegetarian diet [2], Mediterranean diet [8], a healthy cluster: higher intakes of breakfast cereals, low fat and skimmed milks, potatoes, fruit, fish and fish dishes [16]                                                                                                                        |
| Hexose                              | High red meat and fish, and low whole-grain bread and tea dietary pattern [18].                                                                                                                                                                                                                                                    |
| Hydroxy-sphingomyelin               | High butter intake and low margarine intake dietary pattern [18]                                                                                                                                                                                                                                                                   |
| Glycerophospholipids                | Meat eaters [19]                                                                                                                                                                                                                                                                                                                   |
| Sphingolipids                       | Meat eaters [19]                                                                                                                                                                                                                                                                                                                   |
| Lysine                              | Fish eaters [19]; vegetarians [19]                                                                                                                                                                                                                                                                                                 |
| p-Hydroxyphenylacetate              | Vegetarian diet [19]                                                                                                                                                                                                                                                                                                               |
| Methylhistidine                     | Omnivorous diet [2]; low-fat diet [8], a diet that is most concordant with the WHO healthy eating guidelines (1-methylhistidine and 3-methylhistidine) [9]                                                                                                                                                                         |
| Phenylacetylglutamine               | Vegetables [6]; high vegetables, fish, and whole-grain breads (cluster 1) [6]; Red meat [6]; a pattern that is high in meat, refined bread, butter and low in vegetables, whole-meal bread, and fruits (cluster 3) [6], a diet that is least concordant with the WHO healthy eating guidelines and has high intake of red meat [9] |
| O-acetylcarnitine                   |                                                                                                                                                                                                                                                                                                                                    |
| Glycine                             | High vegetables, fish, and whole-grain breads (cluster 1) [6], Mediterranean diet [8].                                                                                                                                                                                                                                             |
| Acetoacetate                        | High vegetables, fish, and whole-grain breads (cluster 1) [6]                                                                                                                                                                                                                                                                      |
| N,Ndimethylglycine                  | A pattern that is high in meat, refined bread, butter and low in vegetables, whole-meal bread, and fruits (cluster 3) [6].                                                                                                                                                                                                         |
| Proline betaine                     | Citrus intake [14]                                                                                                                                                                                                                                                                                                                 |
| Sulforaphane                        | Phytochemical diet [14]                                                                                                                                                                                                                                                                                                            |
| Genistein,                          | Phytochemical diet [14]                                                                                                                                                                                                                                                                                                            |
| Daidzein                            | Phytochemical diet [14]                                                                                                                                                                                                                                                                                                            |
| Equol                               | Phytochemical diet [14]                                                                                                                                                                                                                                                                                                            |
| Glycitein                           | Phytochemical diet [14]                                                                                                                                                                                                                                                                                                            |
| O-desmethylangolensin               | Phytochemical diet [14]                                                                                                                                                                                                                                                                                                            |
| Enterolactone                       | Phytochemical diet [14]                                                                                                                                                                                                                                                                                                            |
| Trigonelline                        | Phytochemical diet [14]                                                                                                                                                                                                                                                                                                            |
| Hydroquinone-glucuronide            | Nordic diet [3]                                                                                                                                                                                                                                                                                                                    |
| 3,4,5,6-tetrahydrohippurate         | Nordic diet [3]                                                                                                                                                                                                                                                                                                                    |
| Glucuronidated alk(en)ylresorcinols | A diet high in whole grains, fatty fish, and bilberries [15]; whole-grain [15]                                                                                                                                                                                                                                                     |
| Furan fatty acids                   | A diet high in whole grains, fatty fish and bilberries [15]; fish intake [15]                                                                                                                                                                                                                                                      |
| Hydroxybutyrate                     | Mediterranean diet (3-hydroxybutyrate) [8]; very-low-carbohydrate diet ( $\beta$ -hydroxybutyrate) [7]; a healthy cluster: higher intakes of breakfast cereals, low fat and skimmed milks, potatoes, fruit, fish, and fish dishes (3-hydroxybutyrate) [16]                                                                         |
| Cisaconitate                        | Mediterranean diet [8]                                                                                                                                                                                                                                                                                                             |
| N-acetylglutamine                   | Mediterranean diet [8]                                                                                                                                                                                                                                                                                                             |
| Oleic acids                         | Mediterranean diet [8]                                                                                                                                                                                                                                                                                                             |
| Suberic acids                       | Mediterranean diet [8]                                                                                                                                                                                                                                                                                                             |
| Histidine                           | Low-fat diet [8]                                                                                                                                                                                                                                                                                                                   |
| Carnosine                           | Low-fat diet [8]                                                                                                                                                                                                                                                                                                                   |
| Anserine                            | Low-fat diet [8]; a healthy cluster: higher intakes of breakfast cereals, low fat and skimmed milks, potatoes, fruit, fish, and fish dishes [16]                                                                                                                                                                                   |
| Xanthosine                          | Low-fat diet [8]                                                                                                                                                                                                                                                                                                                   |
| Nacetyl-S-methyl-cysteine-sulfoxide | Diet 1, which is most concordant with the WHO healthy eating guidelines [9]                                                                                                                                                                                                                                                        |
| Carnitine                           | A diet that is least concordant with the WHO healthy eating guidelines and has high intake of red meat [9]; very-low-carbohydrate diet [7]                                                                                                                                                                                         |
| Triacylglycerol                     | Low-fat diet (C54:5) [7]                                                                                                                                                                                                                                                                                                           |

|                         |                                                                                                                                |
|-------------------------|--------------------------------------------------------------------------------------------------------------------------------|
| Asparagine              | Very-low-carbohydrate diet [7]                                                                                                 |
| Cholesteryl esters      | Very-low-carbohydrate diet [7]                                                                                                 |
| Propionate              | Very-low-carbohydrate diet [7]                                                                                                 |
| Sorbitol                | Very-low-carbohydrate diet [7]                                                                                                 |
| 4-pyridoxate            | Low-fat diet [7]                                                                                                               |
| Triacylglycerides (TG)  | Low-fat diet (certain TGs) [7]; low glycemic index diet (certain TGs) [7]                                                      |
| Allantoin               | Low-fat diet [7]                                                                                                               |
| 2-aminoadipate          | Low-fat diet [7]                                                                                                               |
| Serine                  | Low-fat diet [7]                                                                                                               |
| Cytosine                | Low glycemic index diet [7]                                                                                                    |
| Hydroxyproline          | Low glycemic index diet [7]                                                                                                    |
| 5-aminolevulinic acid   | Low glycemic index diet [7]                                                                                                    |
| Pipecolic acid          | Low glycemic index diet [7]                                                                                                    |
| N-phenylacetylglutamine | A healthy cluster: higher intakes of breakfast cereals, low fat and skimmed milks, potatoes, fruit, fish, and fish dishes [16] |
| 2-aminoadipate          | A healthy cluster: higher intakes of breakfast cereals, low fat and skimmed milks, potatoes, fruit, fish, and fish dishes [16] |
| Glycylproline           | An unhealthy cluster: higher intakes of chips/processed potatoes, meat products, savory snacks, and high-energy beverages [7]  |
| N-aceylalglutamate      | An unhealthy cluster: higher intakes of chips/processed potatoes, meat products, savory snacks, and high-energy beverages [7]  |
| Theophylline            | An unhealthy cluster: higher intakes of chips/processed potatoes, meat products, savory snacks, and high-energy beverages [7]  |

## Reference

1. Stella, C.; Beckwith-Hall, B.; Cloarec, O.; Holmes, E.; Lindon, J.C.; Powell, J.; van der Ouderaa, F.; Bingham, S.; Cross, A.J.; Nicholson, J.K. Susceptibility of human metabolic phenotypes to dietary modulation. *J. Proteome Res.* **2006**, *5*, 2780–2788.
2. Xu, J.; Yang, S.; Cai, S.; Dong, J.; Li, X.; Chen, Z. Identification of biochemical changes in lactovegetarian urine using 1H NMR spectroscopy and pattern recognition. *Anal. Bioanal. Chem.* **2010**, *396*, 1451–1463.
3. Andersen, M.-B.S.; Kristensen, M.; Manach, C.; Pujos-Guillot, E.; Poulsen, S.K.; Larsen, T.M.; Astrup, A.; Dragsted, L. Discovery and validation of urinary exposure markers for different plant foods by untargeted metabolomics. *Anal. Bioanal. Chem.* **2014**, *406*, 1829–1844.
4. Barton, S.; Navarro, S.L.; Buas, M.F.; Schwarz, Y.; Gu, H.; Djukovic, D.; Raftery, D.; Kratz, M.; Neuhaus, M.L.; Lampe, J.W. Targeted plasma metabolome response to variations in dietary glycemic load in a randomized, controlled, crossover feeding trial in healthy adults. *Food Funct.* **2015**, *6*, 2949–2956.
5. Zheng, H.; Lorenzen, J.K.; Astrup, A.; Larsen, L.H.; Yde, C.C.; Clausen, M.R.; Bertram, H.C. Metabolic Effects of a 24-Week Energy-Restricted Intervention Combined with Low or High Dairy Intake in Overweight Women: An NMR-Based Metabolomics Investigation. *Nutrients* **2016**, *8*, 108.
6. O'Sullivan, A.; Gibney, M.J.; Brennan, L. Dietary intake patterns are reflected in metabolomic profiles: Potential role in dietary assessment studies. *Am. J. Clin. Nutr.* **2011**, *93*, 314–321.
7. Esko, T.; Hirschhorn, J.N.; Feldman, H.A.; Hsu, Y.-H.H.; Deik, A.A.; Clish, C.B.; Ebbeling, C.B.; Ludwig, D.S. Metabolomic profiles as reliable biomarkers of dietary composition. *Am. J. Clin. Nutr.* **2017**, *105*, 547–554.
8. Vázquez-Fresno, R.; Llorach, R.; Urpi-Sarda, M.; Lupianez-Barbero, A.; Estruch, R.; Corella, D.; Fitó, M.; Arós, F.; Ruiz-Canela, M.; Salas-Salvadó, J.; et al. Metabolomic Pattern Analysis after Mediterranean Diet Intervention in a Nondiabetic Population: A 1- and 3-Year Follow-up in the PREDIMED Study. *J. Proteome Res.* **2015**, *14*, 531–540.
9. Garcia-Perez, I.; Posma, J.M.; Gibson, R.; Chambers, E.S.; Hansen, T.H.; Vestergaard, H.; Hansen, T.; Beckmann, M.; Pedersen, O.; Elliott, P.; et al. Objective assessment of dietary patterns by use of metabolic phenotyping: A randomised, controlled, crossover trial. *Lancet Diabetes Endocrinol.* **2017**, *5*, 184–195.
10. Johansson-Persson, A.; Barri, T.; Ulmius, M.; Onning, G.; Dragsted, L.O. LC-QTOF/MS metabolomic profiles in human plasma after a 5-week high dietary fiber intake. *Anal. Bioanal. Chem.* **2013**, *405*, 4799–4809.

- 11 Rasmussen, L.G.; Winning, H.; Savorani, F.; Ritz, C.; Engelsen, S.B.; Astrup, A.; Larsen, T.M.; Dragsted, L.O. Assessment of dietary exposure related to dietary GI and fibre intake in a nutritional metabolomic study of human urine. *Genes Nutr.* 2012, 7, 281–293.
- 12 Van Dorsten, F.A.; Daykin, C.A.; Mulder, T.P.J.; Van Duynhoven, J.P.M. Metabonomics approach to determine metabolic differences between green tea and black tea consumption. *J. Agric. Food Chem.* 2006, 54, 6929–6938.
- 13 Law, W.S.; Huang, P.Y.; Ong, E.S.; Ong, C.N.; Li, S.F.Y.; Pasikanti, K.K.; Chan, E.C.Y. Metabonomics investigation of human urine after ingestion of green tea with gas chromatography/mass spectrometry, liquid chromatography/mass spectrometry and (1)H NMR spectroscopy. *Rapid Commun. Mass Spectrom.* RCM 2008, 22, 2436–2446.
- 14 May, D.H.; Navarro, S.L.; Ruczinski, I.; Hogan, J.; Ogata, Y.; Schwarz, Y.; Levy, L.; Holzman, T.; McIntosh, M.W.; Lampe, J.W. Metabolomic profiling of urine: Response to a randomised, controlled feeding study of select fruits and vegetables, and application to an observational study. *Br. J. Nutr.* 2013, 110, 1760–1770.
- 15 Hanhineva, K.; Lankinen, M.A.; Pedret, A.; Schwab, U.; Kolehmainen, M.; Paananen, J.; de Mello, V.; Sola, R.; Lehtonen, M.; Poutanen, K.; et al. Nontargeted Metabolite Profiling Discriminates Diet-Specific Biomarkers for Consumption of Whole Grains, Fatty Fish, and Bilberries in a Randomized Controlled Trial. *J. Nutr.* 2015, 145, 7–17.
- 16 Gibbons, H.; Carr, E.; McNulty, B.A.; Nugent, A.P.; Walton, J.; Flynn, A.; Gibney, M.J.; Brennan, L. Metabolomic-based identification of clusters that reflect dietary patterns. *Mol. Nutr. Food Res.* 2017, 61, 1601050.
- 17 Menni, C.; Zhai, G.; MacGregor, A.; Prehn, C.; Römisch-Margl, W.; Suhre, K.; Adamski, J.; Cassidy, A.; Illig, T.; Spector, T.D.; et al. Targeted metabolomics profiles are strongly correlated with nutritional patterns in women. *Metabolomics* 2013, 9, 506–514.
- 18 Floegel, A.; von Ruesten, A.; Drogan, D.; Schulze, M.B.; Prehn, C.; Adamski, J.; Pischon, T.; Boeing, H. Variation of serum metabolites related to habitual diet: A targeted metabolomic approach in EPIC-Potsdam. *Eur. J. Clin. Nutr.* 2013, 67, 1100–1108.
- 19 Schmidt, J.A.; Rinaldi, S.; Ferrari, P.; Carayol, M.; Achaintre, D.; Scalbert, A.; Cross, A.J.; Gunter, M.J.; Fensom, G.K.; Appleby, P.N.; et al. Metabolic profiles of male meat eaters, fish eaters, vegetarians, and vegans from the EPIC-Oxford cohort. *Am. J. Clin. Nutr.* 2015, 102, 1518–1526.
- 20 Stanstrup, J.; Schou, S.S.; Holmer-Jensen, J.; Hermansen, K.; Dragsted, L.O. Whey protein delays gastric emptying and suppresses plasma fatty acids and their metabolites compared to casein, gluten, and fish protein. *J. Proteome Res.* 2014, 13, 2396–2408.
- 21 Jacobs, S.; Kröger, J.; Floegel, A.; Boeing, H.; Drogan, D.; Pischon, T.; Fritsche, A.; Prehn, C.; Adamski, J.; Isermann, B.; et al. Evaluation of various biomarkers as potential mediators of the association between coffee consumption and incident type 2 diabetes in the EPIC-Potsdam Study. *Am. J. Clin. Nutr.* 2014, 100, 891–900.
- 22 Bouchard-Mercier, A.; Rudkowska, I.; Lemieux, S.; Couture, P.; Vohl, M.-C. The metabolic signature associated with the Western dietary pattern: A cross-sectional study. *Nutr. J.* 2013, 12, 158.
- 23 Garcia Aloy, M.; Llorach, R.; Urpí Sardà, M.; Jáuregui Pallarés, O.; Corella Piquer, D.; Ruiz-Canela, M.; Salas Salvadó, J.; Fitó Colomer, M.; Ros Rahola, E.; Riba, R.E.; et al. A metabolomics-driven approach to predict cocoa product consumption by designing a multimetabolite biomarker model in free-living subjects from the PREDIMED study. *Mol. Nutr. Food Res.* 2015, 59, 212–220.
- 24 Edmands, W.M.; Ferrari, P.; Rothwell, J.A.; Rinaldi, S.; Slimani, N.; Barupal, D.K.; Biessy, C.; Jenab, M.; Clavel-Chapelon, F.; Fagherazzi, G.; et al. Polyphenol metabolome in human urine and its association with intake of polyphenol-rich foods across European countries. *Am. J. Clin. Nutr.* 2015, 102, 905–913.
- 25 Clinical phenotype clustering in cardiovascular risk patients for the identification of responsive metabolotypes after red wine polyphenol intake. *J. Nutr. Biochem.* 2016, 28, 114–120.
- 26 Llorach, R.; Garrido, I.; Monagas, M.; Uрпи-Sarda, M.; Tulipani, S.; Bartolome, B.; Andres-Lacueva, C. Metabolomics study of human urinary metabolome modifications after intake of almond (*Prunus dulcis* (Mill.) D.A. Webb) skin polyphenols. *J. Proteome Res.* 2010, 9, 5859–5867.
- 27 Rangel-Huerta, O.D.; Aguilera, C.M.; Perez-de-la-Cruz, A.; Vallejo, F.; Tomas-Barberan, F.; Gil, A.; Mesa, M.D. A serum metabolomics-driven approach predicts orange juice consumption and its impact on oxidative stress and inflammation in subjects from the BIONAOS study. *Mol. Nutr. Food Res.* 2017, 61, 1600120.

- 28 Heinzmann, S.S.; Brown, I.J.; Chan, Q.; Bictash, M.; Dumas, M.-E.; Kochhar, S.; Stamler, J.; Holmes, E.; Elliott, P.; Nicholson, J.K. Metabolic profiling strategy for discovery of nutritional biomarkers: Proline betaine as a marker of citrus consumption. *Am. J. Clin. Nutr.* **2010**, *92*, 436–443.
- 29 Pujos-Guillot, E.; Hubert, J.; Martin, J.-F.; Lyan, B.; Quintana, M.; Claude, S.; Chabanas, B.; Rothwell, J.A.; Bennetau-Pelissero, C.; Scalbert, A.; et al. Mass spectrometry-based metabolomics for the discovery of biomarkers of fruit and vegetable intake: Citrus fruit as a case study. *J. Proteome Res.* **2013**, *12*, 1645–1659.
- 30 Edmands, W.M.B.; Beckonert, O.P.; Stella, C.; Campbell, A.; Lake, B.G.; Lindon, J.C.; Holmes, E.; Gooderham, N.J. Identification of human urinary biomarkers of cruciferous vegetable consumption by metabonomic profiling. *J. Proteome Res.* **2011**, *10*, 4513–4521.
- 31 Bondia-Pons, I.; Cañellas, N.; Abete, I.; Rodríguez, M.Á.; Perez-Cornago, A.; Navas-Carretero, S.; Zulet, M.Á.; Correig, X.; Martínez, J.A. Nutri-metabolomics: Subtle serum metabolic differences in healthy subjects by NMR-based metabolomics after a short-term nutritional intervention with two tomato sauces. *Omics J. Integr. Biol.* **2013**, *17*, 611–618.
- 32 Moazzami, A.A.; Shrestha, A.; Morrison, D.A.; Poutanen, K.; Mykkänen, H. Metabolomics reveals differences in postprandial responses to breads and fasting metabolic characteristics associated with postprandial insulin demand in postmenopausal women. *J. Nutr.* **2014**, *144*, 807–814.
- 33 Altmaier, E.; Kastenmüller, G.; Römisch-Margl, W.; Thorand, B.; Weinberger, K.M.; Adamski, J.; Illig, T.; Döring, A.; Suhre, K. Variation in the human lipidome associated with coffee consumption as revealed by quantitative targeted metabolomics. *Mol. Nutr. Food Res.* **2009**, *53*, 1357–1365.
- 34 Altmaier, E.; Kastenmüller, G.; Römisch-Margl, W.; Thorand, B.; Weinberger, K.M.; Illig, T.; Adamski, J.; Döring, A.; Suhre, K. Questionnaire-based self-reported nutrition habits associate with serum metabolism as revealed by quantitative targeted metabolomics. *Eur. J. Epidemiol.* **2011**, *26*, 145–156.
- 35 Bondia-Pons, I.; Martinez, J.A.; de la Iglesia, R.; Lopez-Legarrea, P.; Poutanen, K.; Hanhineva, K.; Zulet, M. de los Á. Effects of short- and long-term Mediterranean-based dietary treatment on plasma LC-QTOF/MS metabolic profiling of subjects with metabolic syndrome features: The Metabolic Syndrome Reduction in Navarra (RESMENA) randomized controlled trial. *Mol. Nutr. Food Res.* **2015**, *59*, 711–728.
- 36 Stalmach, A.; Mullen, W.; Barron, D.; Uchida, K.; Yokota, T.; Cavin, C.; Steiling, H.; Williamson, G.; Crozier, A. Metabolite profiling of hydroxycinnamate derivatives in plasma and urine after the ingestion of coffee by humans: Identification of biomarkers of coffee consumption. *Drug Metab. Dispos. Biol. Fate Chem.* **2009**, *37*, 1749–1758.
- 37 Redeuil, K.; Smarrito-Menozzi, C.; Guy, P.; Rezzi, S.; Dionisi, F.; Williamson, G.; Nagy, K.; Renouf, M. Identification of novel circulating coffee metabolites in human plasma by liquid chromatography-mass spectrometry. *J. Chromatogr. A* **2011**, *1218*, 4678–4688.
- 38 First identification of dimethoxycinnamic acids in human plasma after coffee intake by liquid chromatography-mass spectrometry. *J. Chromatogr. A* **2011**, *1218*, 491–497.
- 39 Schröder, H.; de la Torre, R.; Estruch, R.; Corella, D.; Martínez-González, M.A.; Salas-Salvadó, J.; Ros, E.; Arós, F.; Flores, G.; Civit, E.; et al. Alcohol consumption is associated with high concentrations of urinary hydroxytyrosol. *Am. J. Clin. Nutr.* **2009**, *90*, 1329–1335.
- 40 Perez-Jimenez, F.; Alvarez de Cienfuegos, G.; Badimon, L.; Barja, G.; Battino, M.; Blanco, A.; Bonanome, A.; Colomer, R.; Corella-Piquer, D.; Covas, I.; et al. International conference on the healthy effect of virgin olive oil. *Eur. J. Clin. Investig.* **2005**, *35*, 421–424.
- 41 Bondia-Pons, I.; Barri, T.; Hanhineva, K.; Juntunen, K.; Dragsted, L.O.; Mykkänen, H.; Poutanen, K. UPLC-QTOF/MS metabolic profiling unveils urinary changes in humans after a whole grain rye versus refined wheat bread intervention. *Mol. Nutr. Food Res.* **2013**, *57*, 412–422.
- 42 Nestel, P.J.; Straznicky, N.; Mellett, N.A.; Wong, G.; De Souza, D.P.; Tull, D.L.; Barlow, C.K.; Grima, M.T.; Meikle, P.J. Specific plasma lipid classes and phospholipid fatty acids indicative of dairy food consumption associate with insulin sensitivity. *Am. J. Clin. Nutr.* **2014**, *99*, 46–53.
